# Supplementary material for: Physical activity improves outcomes of combined lenvatinib plus anti-PD-1 therapy in unresectable hepatocellular carcinoma: a retrospective study and mouse model
Source: PubMed Central journal article supplement (PMC8978397; doi:10.1186/s40164-022-00275-0), 2022-04-04

CD4

CD8

F4/80

Control

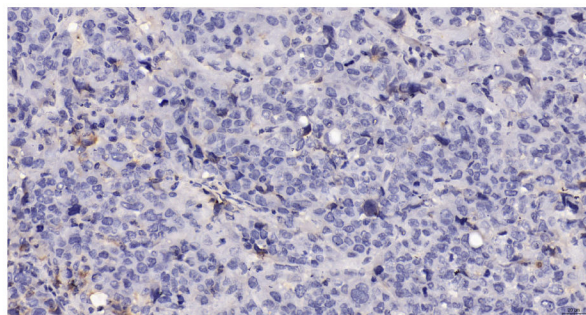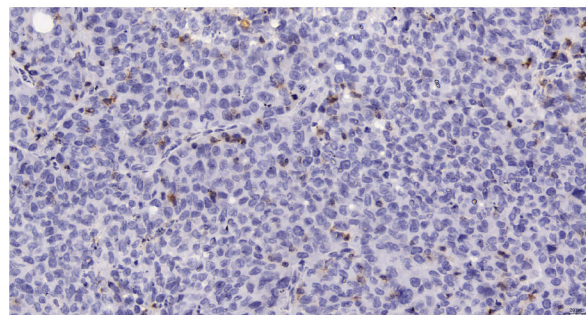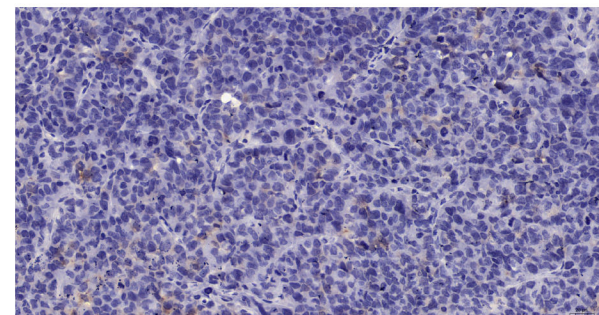

Combination therapy

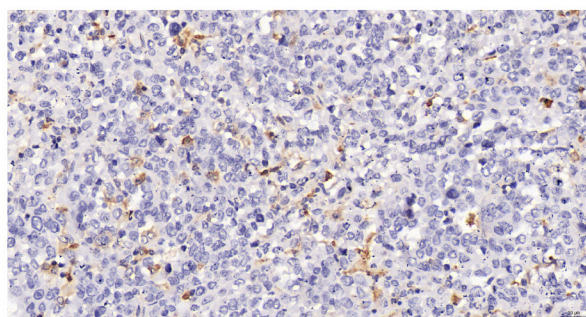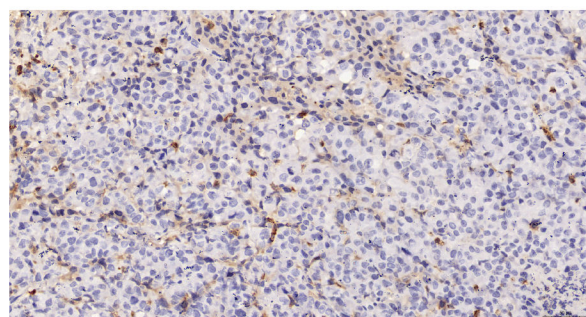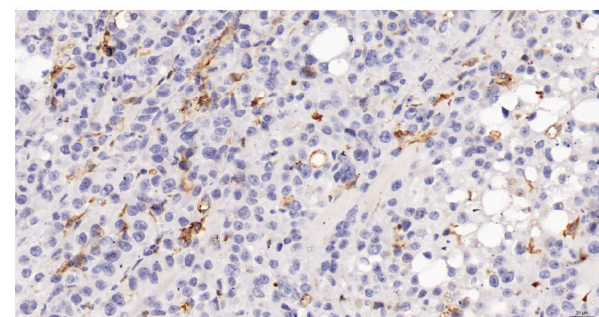Combination therapy  
+physical activity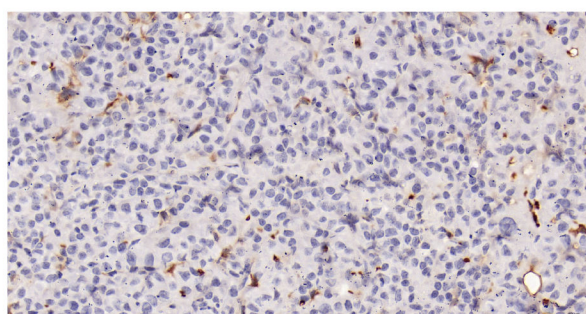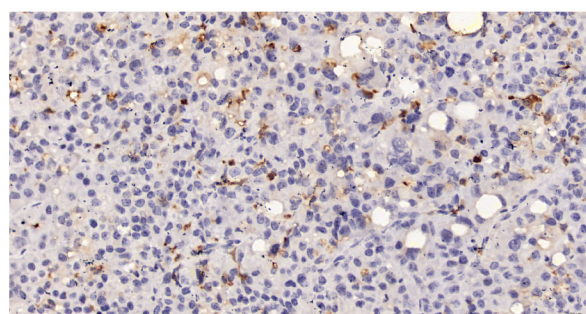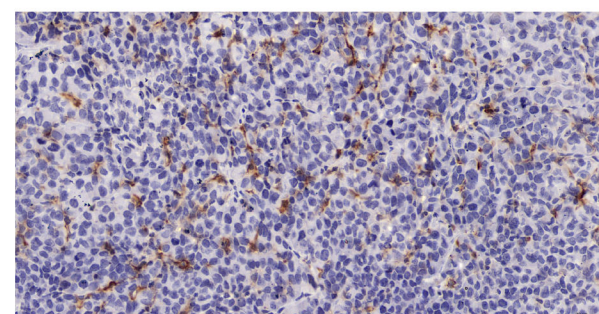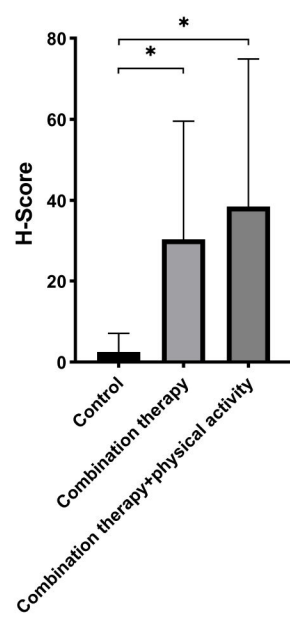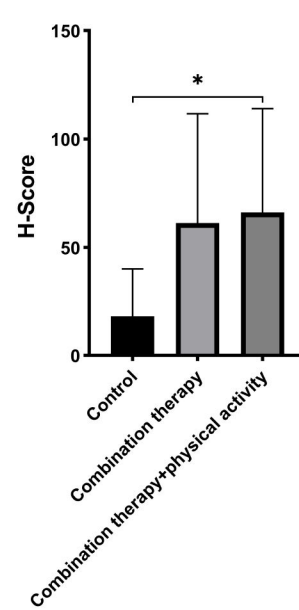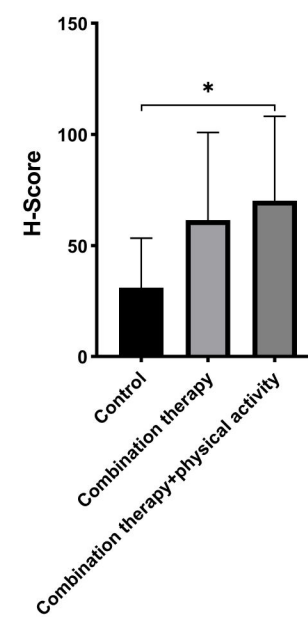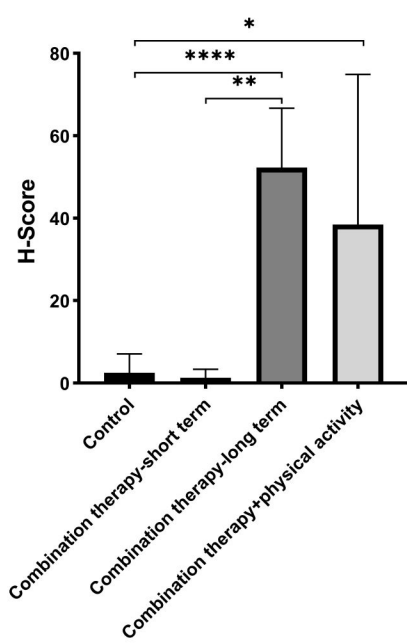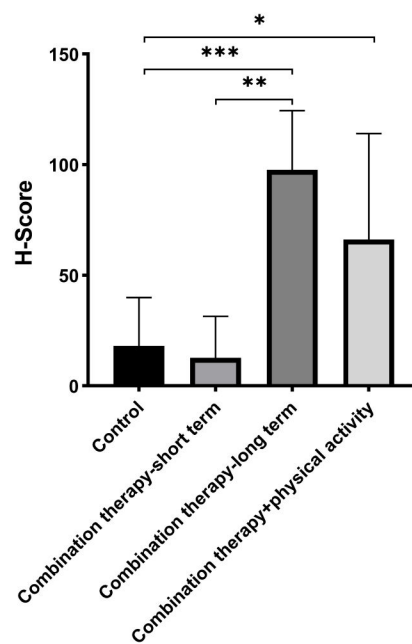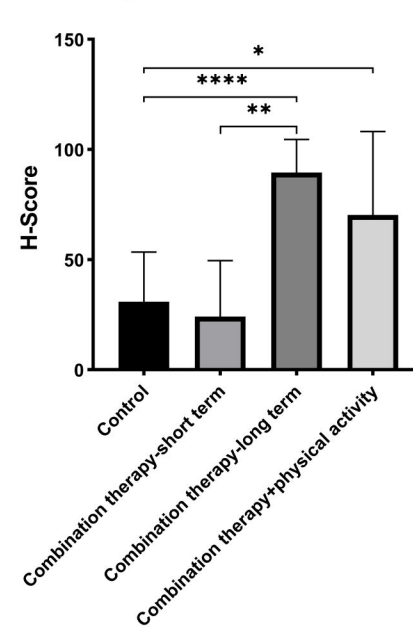

Supplement: 40164_2022_275_MOESM1_ESM.pdf [file 40164_2022_275_MOESM1_ESM.pdf]
